# Supplementary material for: A streamlined workflow for single-cells genome-wide copy-number profiling by low-pass sequencing of LM-PCR whole-genome amplification products
Source: PLOS journal article supplement (doi:10.1371/journal.pone.0193689), 2018-03-01
Supplement: S5 (10.1371/journal.pone.0193689.s005) [file journal.pone.0193689.s005]

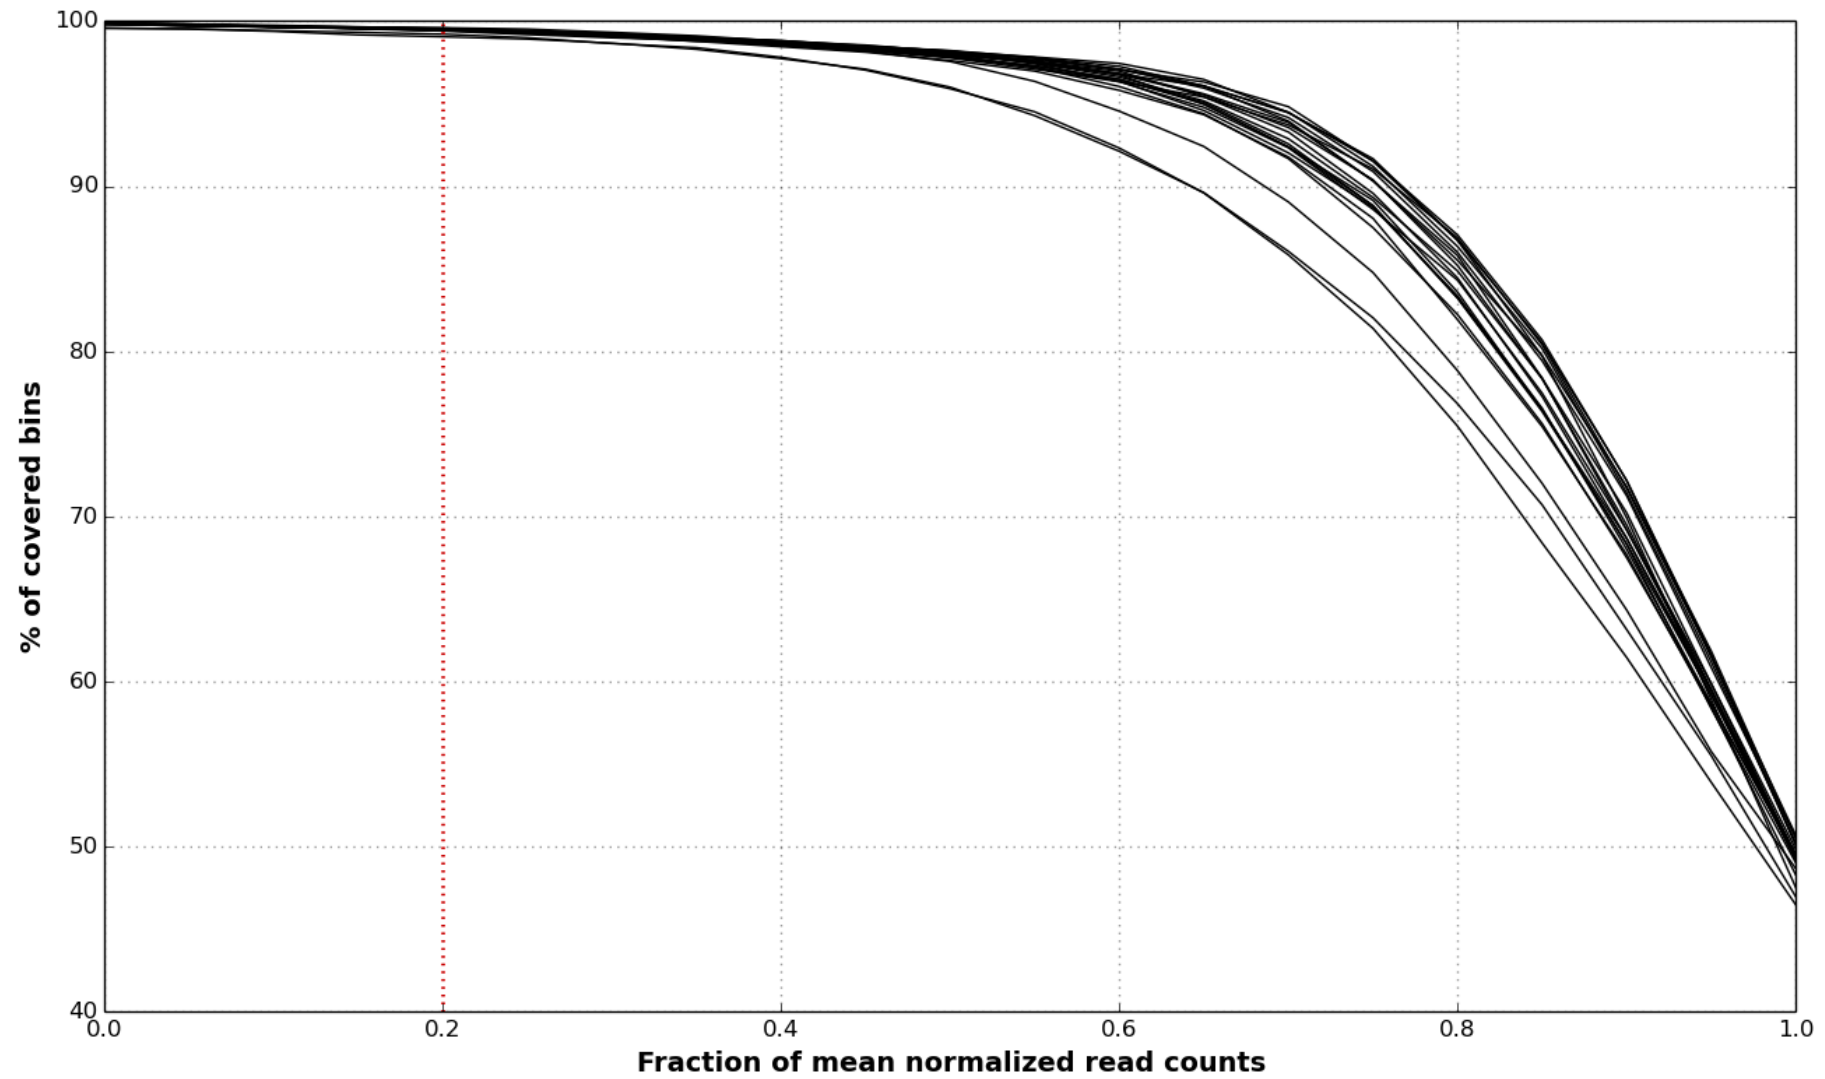

**S4 Figure: Uniformity.** Each WBC shows an uniformity value greater than 99%; 90% of bins is on average covered by >60% of normalized read counts average.
