# Supplementary material for: A streamlined workflow for single-cells genome-wide copy-number profiling by low-pass sequencing of LM-PCR whole-genome amplification products
Source: PLOS journal article supplement (doi:10.1371/journal.pone.0193689), 2018-03-01
Supplement: S8 (10.1371/journal.pone.0193689.s008) [file journal.pone.0193689.s008]

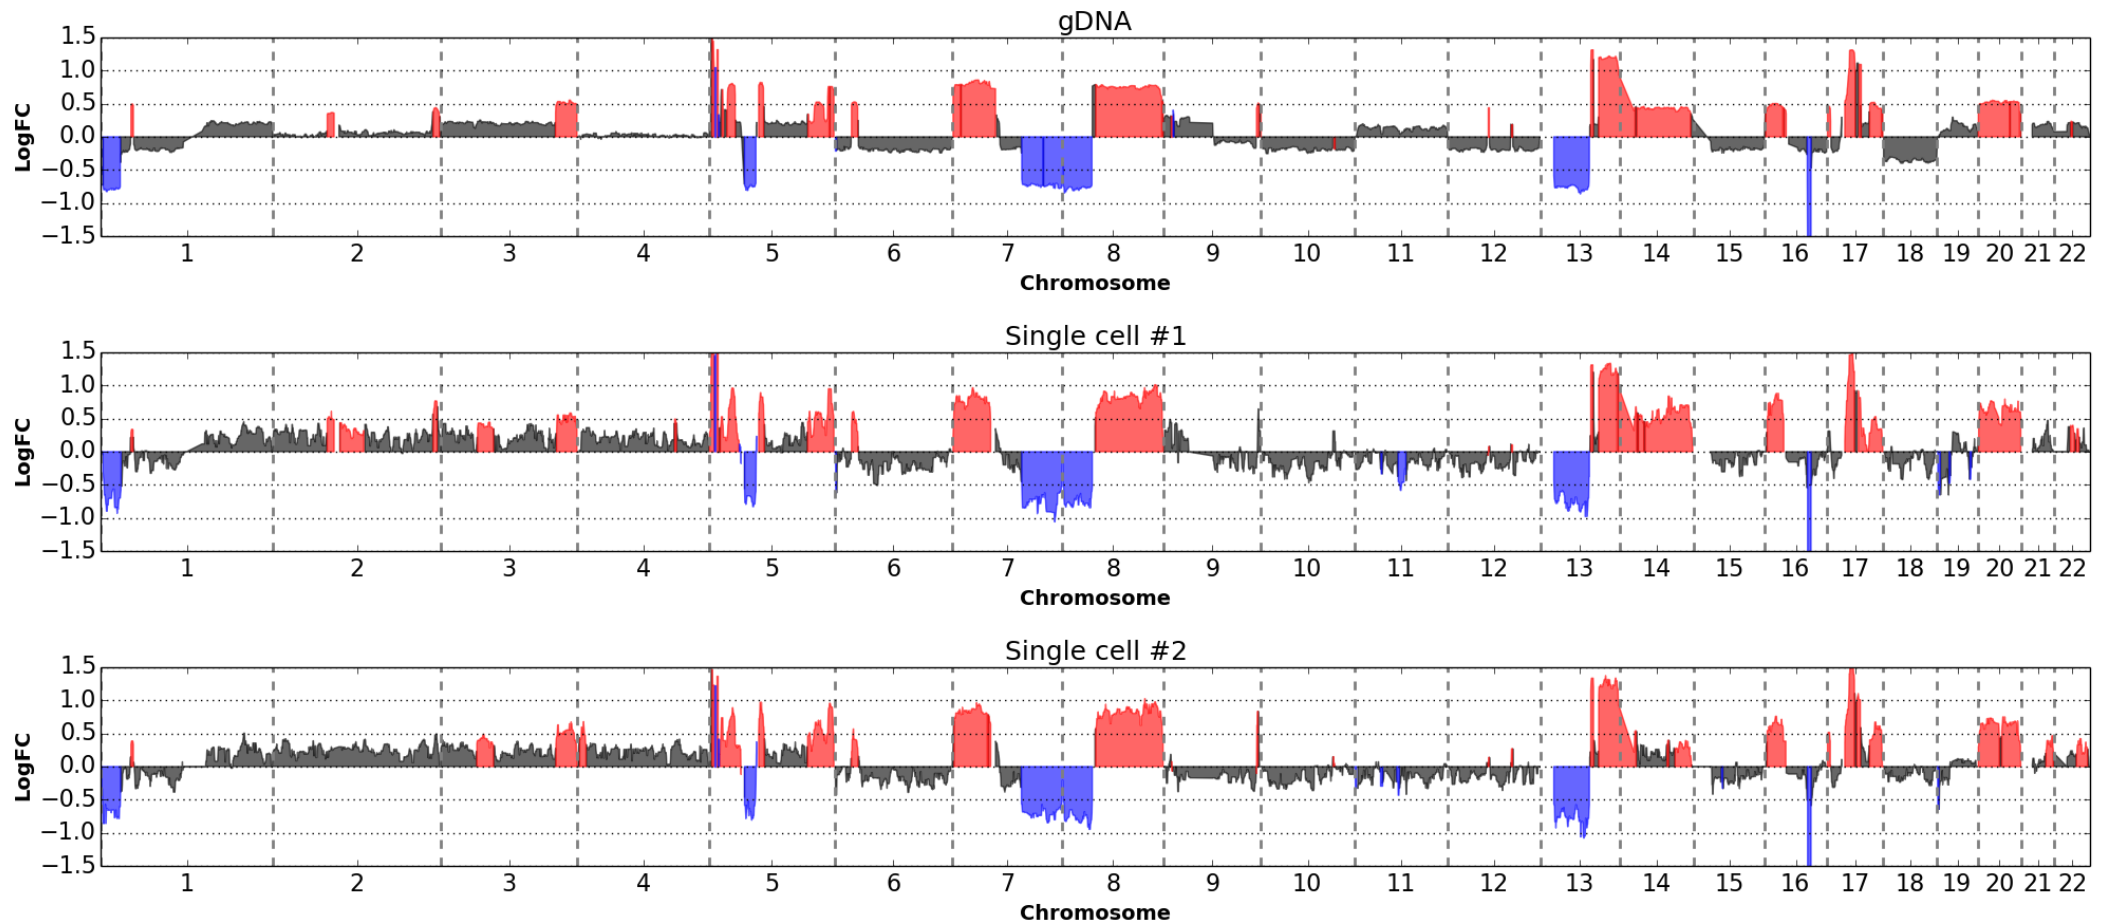

**S7 Figure: Copy number profiles in line NCI-H1563.** On top: copy number profiles obtained by WGS of bulk genomic DNA (gDNA); in the 2 plots on bottom: copy number profiles by low-pass WGS on DNA from 2 single cells amplified with *Ampli1*<sup>™</sup> WGA kit. Copy number values are expressed as logged fold change. Statistically significant copy number gains are highlighted in red while statistically significant copy number losses are highlighted in blue.
