# Supplementary material for: A streamlined workflow for single-cells genome-wide copy-number profiling by low-pass sequencing of LM-PCR whole-genome amplification products
Source: PLOS journal article supplement (doi:10.1371/journal.pone.0193689), 2018-03-01
Supplement: S14 (10.1371/journal.pone.0193689.s014) [file journal.pone.0193689.s014]

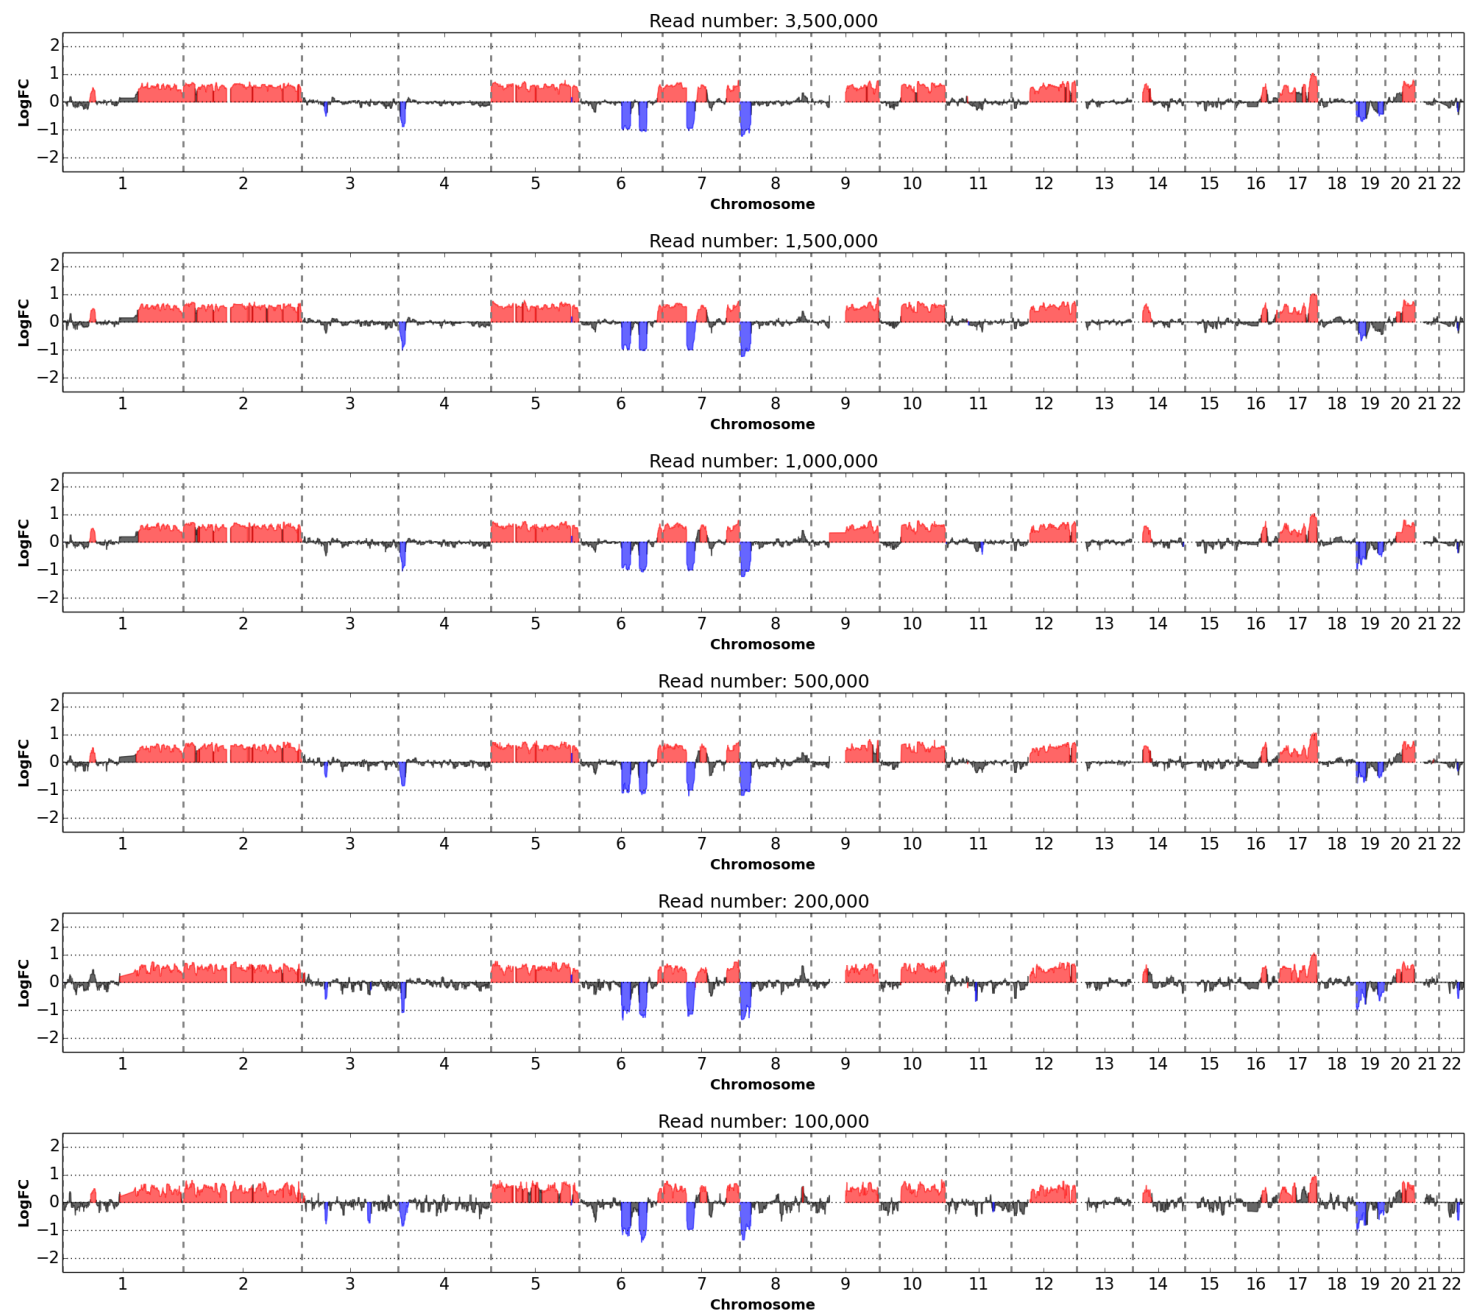

**S13 Figure: Copy number profiles in cell line NCI-1650 cell #1 at 500 Kbp resolution at different downsampling factors.**
