# Supplementary material for: A streamlined workflow for single-cells genome-wide copy-number profiling by low-pass sequencing of LM-PCR whole-genome amplification products
Source: PLOS journal article supplement (doi:10.1371/journal.pone.0193689), 2018-03-01
Supplement: S15 (10.1371/journal.pone.0193689.s015) [file journal.pone.0193689.s015]

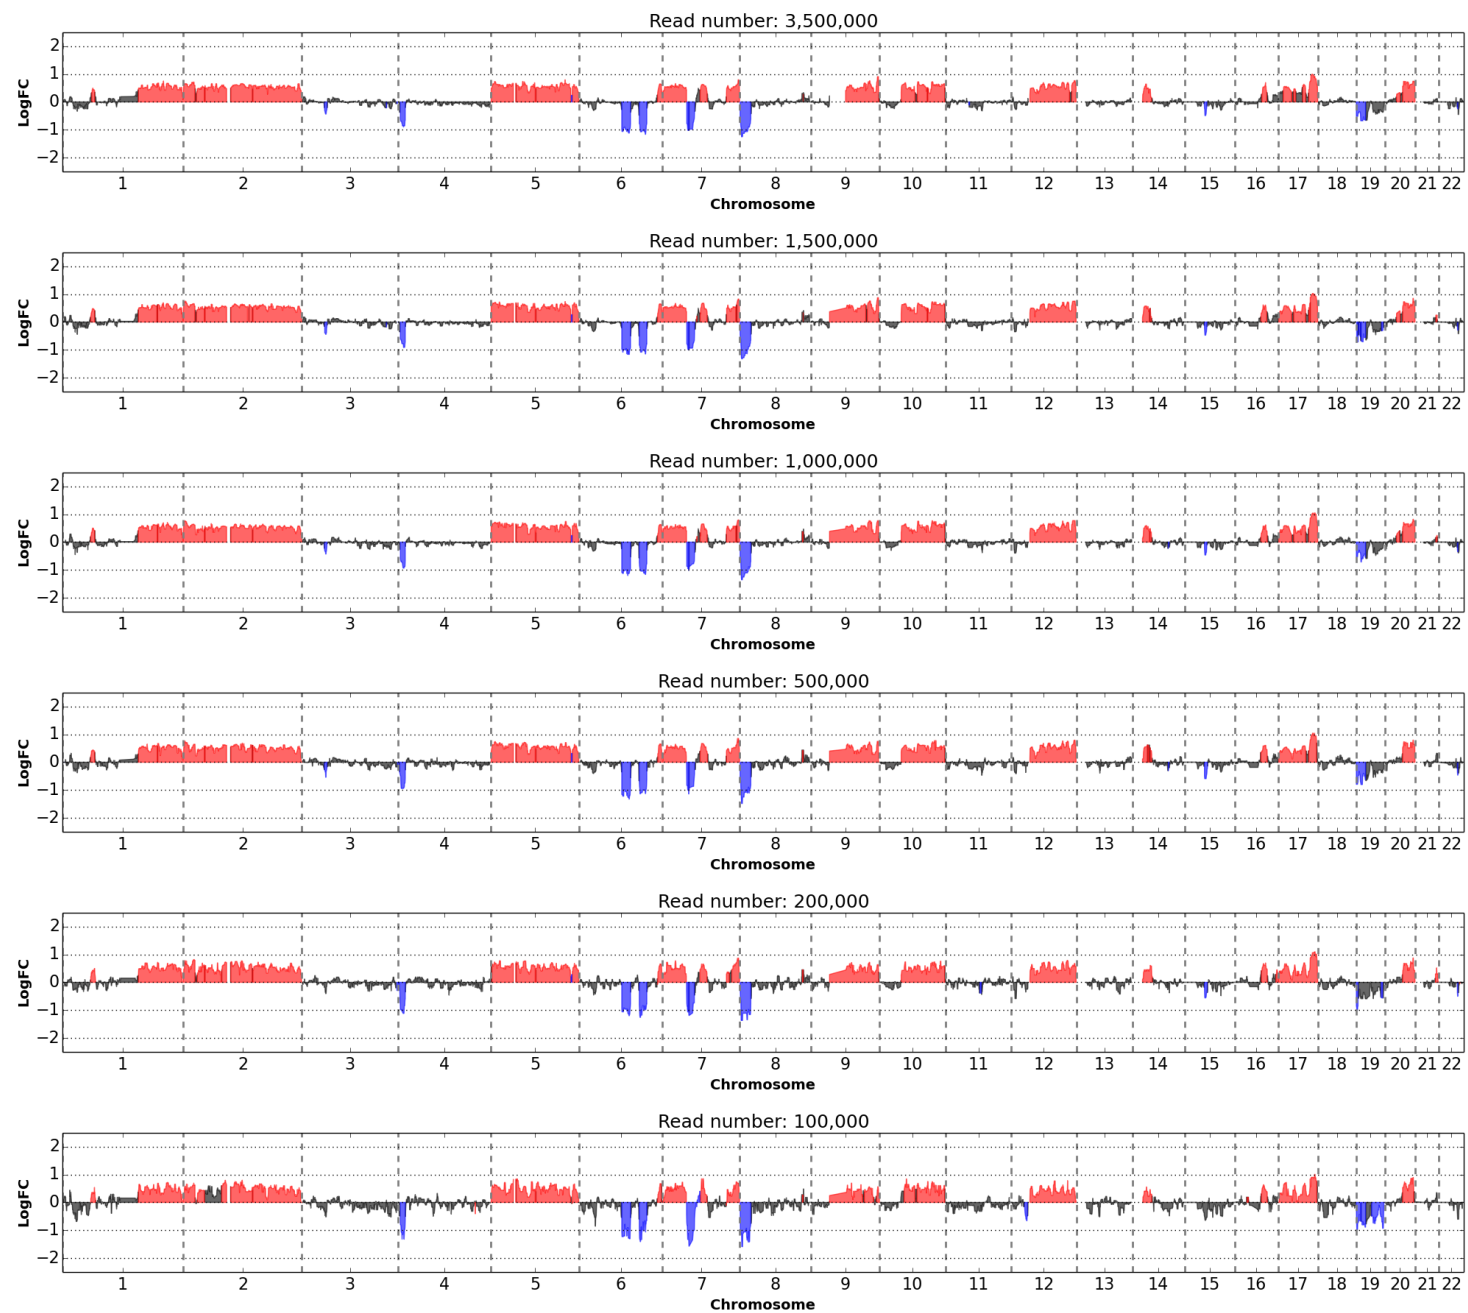

**S14 Figure: Copy number profiles in cell line NCI-1650 cell #2 at 500 kbp resolution at different downsampling factors.**
