# Supplementary material for: A streamlined workflow for single-cells genome-wide copy-number profiling by low-pass sequencing of LM-PCR whole-genome amplification products
Source: PLOS journal article supplement (doi:10.1371/journal.pone.0193689), 2018-03-01
Supplement: S28 (10.1371/journal.pone.0193689.s028) [file journal.pone.0193689.s028]

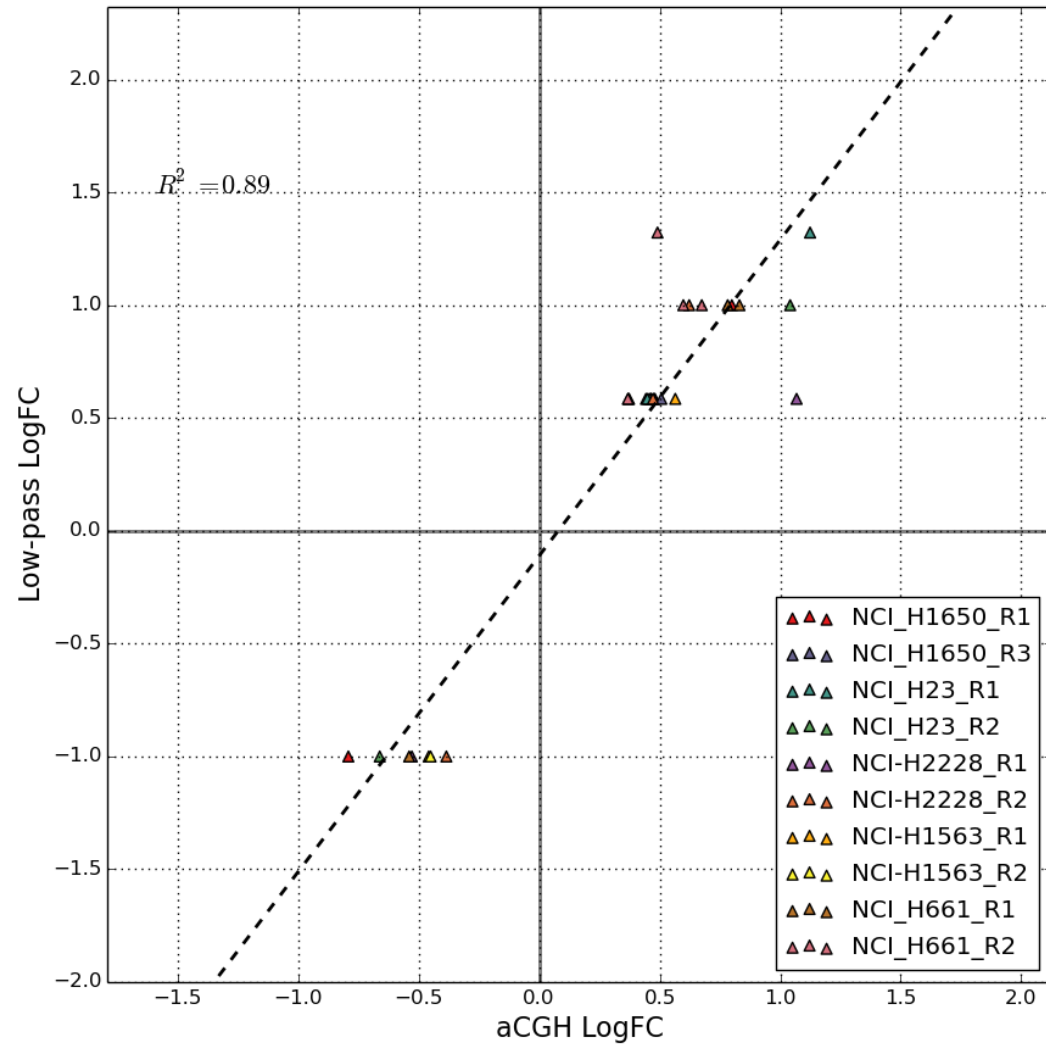

**S27 Figure: Correlation of LP vs aCGH logFC for common CNAs.** Only CNAs of length  $\geq 500\text{Kb}$  were considered.
